# Supplementary material
Source: HighWire-hosted journal article supplement (https://erj.ersjournals.com/content/54/6/1901441)
Supplement: inline-supplementary-material-1 [file inline-supplementary-material-1.pdf]

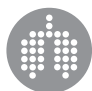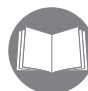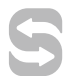

SHAREABLE PDF

# Standardisation of cardiopulmonary exercise testing in chronic lung diseases: summary of key findings from the ERS task force

Thomas Radtke <sup>1</sup>, Ioannis Vogiatzis<sup>2,3,9</sup>, Don S. Urquhart <sup>4</sup>, Pierantonio Laveneziana<sup>5,6</sup>, Richard Casaburi<sup>7</sup> and Helge Hebestreit<sup>8,9</sup>, on behalf of the European Respiratory Society Task Force on Standardisation of Cardiopulmonary Exercise Testing in Chronic Lung Diseases<sup>10</sup>

**Affiliations:** <sup>1</sup>Division of Occupational and Environmental Medicine, Epidemiology, Biostatistics and Prevention Institute, University of Zurich and University Hospital Zurich, Zurich, Switzerland. <sup>2</sup>Dept of Sport, Exercise and Rehabilitation, Faculty of Health and Life Sciences, Northumbria University Newcastle, Newcastle, UK. <sup>3</sup>First Dept of Respiratory Medicine, National and Kapodistrian University of Athens, Athens, Greece. <sup>4</sup>Dept of Paediatric Respiratory and Sleep Medicine, Royal Hospital for Sick Children, Edinburgh, UK. <sup>5</sup>Sorbonne Université, INSERM, UMRS1158 Neurophysiologie Respiratoire Expérimentale et Clinique, Paris, France. <sup>6</sup>AP-HP Sorbonne Université, Groupe Hospitalier Pitié-Salpêtrière Charles Foix, Service des Explorations Fonctionnelles de la Respiration, de l'Exercice et de la Dyspnée du Département Médico-Universitaire "APPROCHES", Paris, France. <sup>7</sup>Rehabilitation Clinical Trials Center, Los Angeles Biomedical Research Institute at Harbor-UCLA Medical Center, Torrance, CA, USA. <sup>8</sup>Paediatric Dept, University Hospital Würzburg, Würzburg, Germany. <sup>9</sup>Task force co-chairs. <sup>10</sup>A full list of members of the task force can be found in the acknowledgements section.

**Correspondence:** Helge Hebestreit, Universitäts-Kinderklinik, Josef-Schneider-Str. 2 97080 Würzburg, Germany, E-mail: hebestreit@uni-wuerzburg.de

@ERSpublications

The new ERS statement facilitates standardisation of conducting, reporting and interpreting cardiopulmonary exercise tests in chronic lung diseases. The conclusions are especially valuable for multicentre comparisons and for establishing global reference data. <http://bit.ly/32Y0eO0>

**Cite this article as:** Radtke T, Vogiatzis I, Urquhart DS, *et al.* Standardisation of cardiopulmonary exercise testing in chronic lung diseases: summary of key findings from the ERS task force. *Eur Respir J* 2019; 54: 1901441 [<https://doi.org/10.1183/13993003.01441-2019>].

This single-page version can be shared freely online.

Cardiopulmonary exercise testing (CPET) is a powerful diagnostic and prognostic tool in the management of people with a variety of chronic lung diseases [1–5]. Despite the remarkable increase in the number of publications on CPET over the past decades [2], CPET remains underutilised in the field of respiratory medicine. Numerous challenges of utilising CPET in both clinical practice and research await resolution, including the establishment of global reference values, in line with those available for lung function and pulmonary diffusing capacity [6, 7]. Prior to such an international effort, strict standardisation of testing procedures is indispensable, in order to obtain valid and reliable results and to enable interpretation of CPET results within and between centres and individuals. Furthermore, an internationally standardised protocol is a prerequisite for the use of CPET data in patient registries and in retrospective collaborative research.
